# Supplementary material for: Role of Glycine max in improving drought tolerance in Zanthoxylum bungeanum
Source: PeerJ. 2020 May 5;8:e9040. doi: 10.7717/peerj.9040 (PMC7207205; doi:10.7717/peerj.9040)
Supplement: Supplemental Information 1 [file peerj-08-9040-s001.xls]

## Sheet: Height
	Z: Z.bungeanum
	Z-C: Z.bungeanum + C.annuum
	Z-G: Z.bungeanum + G.max
	Quadrat number	Plant system	Treatment	Height（cm）	Average
	6	Z	Drought	168
	21	Z	Drought	149	158.5
	38	Z	Drought	158.5
	10	Z	CK	155
	15	Z	CK	161.5	161.5
	25	Z	CK	168
	28	Z-C	Drought	198
	37	Z-C	Drought	149	149
	19	Z-C	Drought	100
	1	Z-C	CK	186
	23	Z-C	CK	203	180
	35	Z-C	CK	151
	40	Z-G	Drought	173
	17	Z-G	Drought	146	136
	5	Z-G	Drought	89
	9	Z-G	CK	187
	24	Z-G	CK	184	158
	36	Z-G	CK	103

## Sheet: Crown diameter
	Z: Z.bungeanum
	Z-C: Z.bungeanum + C.annuum
	Z-G: Z.bungeanum + G.max
	Quadrat number	Plant system	Treatment	Crown diameter(cm)	Average
	6	Z	Drought	46
	21	Z	Drought	40	40
	38	Z	Drought	34
	33	Z	CK	107
	10	Z	CK	105	100.667
	25	Z	CK	90
	28	Z-C	Drought	97
	19	Z-C	Drought	63	68.3333
	37	Z-C	Drought	45
	1	Z-C	CK	100
	23	Z-C	CK	118	100.667
	35	Z-C	CK	84
	40	Z-G	Drought	78
	31	Z-G	Drought	76	61.6667
	5	Z-G	Drought	31
	9	Z-G	CK	109.1
	24	Z-G	CK	112.5	110.783
	36	Z-G	CK	110.75

## Sheet: Pigment content
	Z: Z.bungeanum
	Z-C: Z.bungeanum + C.annuum
	Z-G: Z.bungeanum + G.max
	Quadrat number	Plant system	Treatment	OD662nm	OD645nm	OD470nm	Chla content(mg/g)	Chl b content(mg/g)	Car content(mg/g)	Average of Chl a	Average of Chl b	Average of Car
	6	Z	Drought	0.609	0.265	0.71	3.9151	2.52001	2.18495
	21	Z	Drought	0.495	0.237	0.592	3.9151	2.45037	1.6901	3.9151	2.19102	1.92701
	38	Z	Drought	0.366	0.164	0.572	3.9151	1.60268	1.90597
	33	Z	CK	0.311	0.133	0.458	4.86097	2.31177	1.74972
	10	Z	CK	0.53	0.237	0.638	5.67055	2.31177	1.92489	4.86097	2.24708	1.72972
	15	Z	CK	0.379	0.171	0.539	4.0514	2.1177	1.57455
	28	Z-C	Drought	0.456	0.24	0.644	4.794	2.66064	1.88709
	37	Z-C	Drought	0.396	0.24	0.644	4.089	2.89824	2.30101	4.2065	2.85864	2.02506
	22	Z-C	Drought	0.366	0.24	0.644	3.7365	3.01704	1.88709
	1	Z-C	CK	0.46	0.231	0.616	4.86215	2.47731	1.7767
	23	Z-C	CK	0.674	0.318	0.81	4.68825	3.24894	1.92161	4.68825	2.86313	1.91161
	35	Z-C	CK	0.425	0.204	0.554	4.51435	2.86313	2.06653
	40	Z-G	Drought	0.499	0.237	0.658	4.36865	1.775	1.97262
	5	Z-G	Drought	0.4385	0.2005	0.6045	4.6812	1.99485	1.90085	4.36865	1.775	1.90085
	31	Z-G	Drought	0.378	0.164	0.551	4.0561	1.55516	1.82909
	9	Z-G	CK	0.523	0.231	0.642	5.6024	2.22783	1.97329
	36	Z-G	CK	0.461	0.1895	0.581	4.97142	1.70103	1.89978	4.97142	1.70103	1.89978
	24	Z-G	CK	0.399	0.148	0.52	4.34045	1.17424	1.82627

## Sheet: LRWC
	Z: Z.bungeanum
	Z-C: Z.bungeanum + C.annuum
	Z-G: Z.bungeanum + G.max
	Quadrat number	Plant system	Treatment	Fresh weight(g)	Saturation weight(g)	Dry weight+Bag weight(g)	Bag weight(g)	LRWC	Average
	6	Z	Drought	0.305	0.37	5.102	5.026	0.778912
	21	Z	Drought	0.271	0.317	4.982	4.833	0.72619	0.74739
	38	Z	Drought	0.226	0.287	4.968	4.913	0.737069
	33	Z	CK	0.244	0.2786	4.908	4.855	0.846631
	10	Z	CK	0.267	0.289	5.126	5.063	0.902655	0.861484
	15	Z	CK	0.29	0.335	4.961	4.899	0.835165
	28	Z-C	Drought	0.279	0.356	5.012	4.949	0.737201
	19	Z-C	Drought	0.279	0.356	5.012	4.833	0.564972	0.622382
	37	Z-C	Drought	0.279	0.356	5.012	4.833	0.564972
	1	Z-C	CK	0.215	0.335	5.089	5.049	0.59322
	23	Z-C	CK	0.256	0.313	5.076	5.024	0.781609	0.665941
	35	Z-C	CK	0.293	0.434	5.098	5.038	0.622995
	40	Z-G	Drought	0.226	0.277	5.026	5.017	0.809701
	31	Z-G	Drought	0.242	0.2815	4.967	4.9365	0.845022	0.845022
	5	Z-G	Drought	0.258	0.286	4.908	4.856	0.880342
	9	Z-G	CK	0.252	0.294	4.965	4.912	0.825726
	36	Z-G	CK	0.24	0.2725	4.9225	4.8725	0.856491	0.856491
	24	Z-G	CK	0.228	0.251	4.88	4.833	0.887255

## Sheet: Pn
	Z: Z.bungeanum
	Z-C: Z.bungeanum + C.annuum
	Z-G: Z.bungeanum + G.max
	Quadrat number	Plant system	Treatment	Pn(µmol m-2 s-1)	Average
	6	Z	Drought	11.344
	21	Z	Drought	12.6662	12.7455
	38	Z	Drought	14.2264
	33	Z	CK	15.4181
	15	Z	CK	15.3591	15.3591
	25	Z	CK	15.3001
	28	Z-C	Drought	11.8313
	19	Z-C	Drought	13.7104	13.7104
	37	Z-C	Drought	15.5895
	1	Z-C	CK	16.3938
	23	Z-C	CK	16.3938	16.3938
	35	Z-C	CK	16.3938
	31	Z-G	Drought	11.7733
	17	Z-G	Drought	13.1778	11.7733
	5	Z-G	Drought	10.3687
	9	Z-G	CK	13.9382
	24	Z-G	CK	12.4283	13.9382
	36	Z-G	CK	15.4481

## Sheet: Ci
	Z: Z.bungeanum
	Z-C: Z.bungeanum + C.annuum
	Z-G: Z.bungeanum + G.max
	Quadrat number	Plant system	Treatment	Ci(µmol mol-1)	Average
	6	Z	Drought	291.725
	21	Z	Drought	310.636	291.725
	38	Z	Drought	272.814
	33	Z	CK	294.284
	10	Z	CK	312.026	305.062
	15	Z	CK	308.875
	28	Z-C	Drought	305.916
	19	Z-C	Drought	295.936	295.936
	37	Z-C	Drought	285.955
	1	Z-C	CK	336.013
	23	Z-C	CK	278.759	301.198
	35	Z-C	CK	288.821
	40	Z-G	Drought	282.727
	31	Z-G	Drought	296.183	289.455
	17	Z-G	Drought	289.455
	9	Z-G	CK	321.211
	24	Z-G	CK	302.402	302.402
	36	Z-G	CK	283.594

## Sheet: Gs
	Z: Z.bungeanum
	Z-C: Z.bungeanum + C.annuum
	Z-G: Z.bungeanum + G.max
	Quadrat number	Plant system	Treatment	Gs (mol m-2 s-1)	Average
	6	Z	Drought	0.314081
	21	Z	Drought	0.375318	0.314081
	38	Z	Drought	0.252844
	33	Z	CK	0.378453
	15	Z	CK	0.332711	0.343165
	25	Z	CK	0.318329
	28	Z-C	Drought	0.298762
	22	Z-C	Drought	0.285164	0.285164
	37	Z-C	Drought	0.271566
	1	Z-C	CK	0.297613
	23	Z-C	CK	0.327613	0.307613
	35	Z-C	CK	0.297613
	40	Z-G	Drought	0.36048
	31	Z-G	Drought	0.343993	0.352237
	17	Z-G	Drought	0.352237
	9	Z-G	CK	0.425749
	24	Z-G	CK	0.369485	0.369485
	36	Z-G	CK	0.31322

## Sheet: Tr
	Z: Z.bungeanum
	Z-C: Z.bungeanum + C.annuum
	Z-G: Z.bungeanum + G.max
	Quadrat number	Plant system	Treatment	Tr (mmol m-2 s-1)	Average
	6	Z	Drought	2.07529
	21	Z	Drought	2.3545	2.3545
	38	Z	Drought	2.63371
	33	Z	CK	3.23897
	10	Z	CK	3.54747	3.54747
	25	Z	CK	3.85598
	28	Z-C	Drought	2.9629
	22	Z-C	Drought	2.78813	2.78813
	37	Z-C	Drought	2.61337
	1	Z-C	CK	3.73257
	23	Z-C	CK	3.63257	3.69924
	35	Z-C	CK	3.73257
	31	Z-G	Drought	3.22121
	17	Z-G	Drought	2.86084	2.86084
	5	Z-G	Drought	2.50048
	9	Z-G	CK	3.00575
	24	Z-G	CK	3.23821	3.12198
	36	Z-G	CK	3.12198

## Sheet: WUEintr
	Z: Z.bungeanum
	Z-C: Z.bungeanum + C.annuum
	Z-G: Z.bungeanum + G.max
	Quadrat number	Plant system	Treatment	Pn	Tr	WUEintr (µmol mol-1)	Average
	6	Z	Drought	11.344	2.07529	5.46623
	21	Z	Drought	12.6662	2.3545	5.37957	5.41582
	38	Z	Drought	14.2264	2.63371	5.40166
	33	Z	CK	15.4181	3.23897	4.76017
	10	Z	CK	15.3591	3.54747	4.32958	4.35255
	25	Z	CK	15.3001	3.85598	3.96789
	28	Z-C	Drought	11.8313	2.9629	3.99314
	22	Z-C	Drought	13.7104	2.78813	4.9174	4.95861
	19	Z-C	Drought	15.5895	2.61337	5.96528
	1	Z-C	CK	16.3938	3.73257	4.39208
	23	Z-C	CK	16.3938	3.63257	4.51299	4.43238
	35	Z-C	CK	16.3938	3.73257	4.39208
	31	Z-G	Drought	11.7733	3.22121	3.65493
	17	Z-G	Drought	13.1778	2.86084	4.60628	4.13597
	5	Z-G	Drought	10.3687	2.50048	4.1467
	9	Z-G	CK	13.9382	3.00575	4.63718
	24	Z-G	CK	12.4283	3.23821	3.83803	4.47446
	36	Z-G	CK	15.4481	3.12198	4.94817

## Sheet: Ls
	Z: Z.bungeanum
	Z-C: Z.bungeanum + C.annuum
	Z-G: Z.bungeanum + G.max
	Quadrat number	Plant system	Treatment	Ls	Average
	6	Z	Drought	0.900019
	21	Z	Drought	0.822704	0.861362
	38	Z	Drought	0.861362
	33	Z	CK	0.79111
	10	Z	CK	0.771909	0.771909
	25	Z	CK	0.752708
	28	Z-C	Drought	0.803077
	22	Z-C	Drought	0.853613	0.853613
	19	Z-C	Drought	0.904149
	1	Z-C	CK	0.729549
	23	Z-C	CK	0.720143	0.729549
	35	Z-C	CK	0.738954
	31	Z-G	Drought	0.893281
	17	Z-G	Drought	0.844141	0.893281
	5	Z-G	Drought	0.94242
	9	Z-G	CK	0.777208
	24	Z-G	CK	0.797227	0.777208
	36	Z-G	CK	0.757189

[truncated: 25 more sheets: Soluble sugar, Soluble protein, Proline, O2–. producing rate, H2O2, MDA, SOD, CAT, Plant height , Plant crown diameter , Plant pigment, Plant LRWC, Plant Pn, Plant Ci, Plant Gs, Plant Tr, Plant WUEintr, Plant H2O2, Plant O2–. producing rate, Plant MDA …]
